# Supplementary material
Source: PubMed Central journal article supplement (PMC3335367)
Supplement: NIHMS368734-supplement-1_si_001.pdf [file NIHMS368734-supplement-1_si_001.pdf]

# Design, Synthesis, and Biological Evaluation of Estrogen Receptor Antagonist–Drug Bioconjugate for Targeting Breast Cancer Cell

Kinh-Luan Dao,<sup>‡</sup>Rupa Sawant,<sup>‡</sup>James A. Hendricks, Victoria Ronga, \*Robert N. Hanson,  
<sup>‡</sup>Vladimir Torchilin

Department of Chemistry and Chemical Biology, 360 Huntington Blvd, Northeastern University,  
Boston Massachusetts 02115-50000

## *Supporting Information*

### CONTENTS

|                                            |      |
|--------------------------------------------|------|
| S1: <sup>1</sup> H NMR of <b>2α</b> -----  | pg.3 |
| S2: <sup>13</sup> C NMR of <b>2α</b> ----- | pg.3 |
| S3: <sup>1</sup> H NMR of <b>3</b> -----   | pg.4 |
| S4: <sup>13</sup> C NMR of <b>3</b> -----  | pg.4 |
| S5: <sup>1</sup> H NMR of <b>4</b> -----   | pg.5 |
| S6: <sup>13</sup> C NMR of <b>4</b> -----  | pg.5 |
| S7: <sup>1</sup> H NMR of <b>5</b> -----   | pg.6 |
| S8: <sup>13</sup> C NMR of <b>5</b> -----  | pg.6 |
| S9: <sup>1</sup> H NMR of <b>6</b> -----   | pg.7 |
| S10: <sup>13</sup> C NMR of <b>6</b> ----- | pg.7 |
| S11: <sup>1</sup> H NMR of <b>7</b> -----  | pg.8 |
| S12: <sup>13</sup> C NMR of <b>7</b> ----- | pg.8 |
| S13: <sup>1</sup> H NMR of <b>8</b> -----  | pg.9 |

|                                                                                     |        |
|-------------------------------------------------------------------------------------|--------|
| S14: $^{13}\text{C}$ NMR of <b>8</b> -----                                          | pg.9   |
| S15: $^1\text{H}$ NMR of <b>9</b> -----                                             | pg.10  |
| S16: $^{13}\text{C}$ NMR of <b>9</b> -----                                          | pg.10  |
| S17: $^1\text{H}$ NMR of <b>10</b> -----                                            | pg.11  |
| S18: $^{13}\text{C}$ NMR of <b>10</b> -----                                         | pg.11  |
| S19: $^1\text{H}$ NMR of <b>11</b> -----                                            | pg.12  |
| S20: $^{13}\text{C}$ NMR of <b>11</b> -----                                         | pg.12  |
| S21: $^1\text{H}$ NMR of <b>12</b> -----                                            | pg.13  |
| S22: $^{13}\text{C}$ NMR of <b>12</b> -----                                         | pg.13  |
| S23: $^1\text{H}$ NMR of <b>13</b> -----                                            | pg.14  |
| S24: $^{13}\text{C}$ NMR of <b>13</b> -----                                         | pg.14  |
| S25: $^1\text{H}$ NMR of <b>15</b> -----                                            | pg.15  |
| S26: Stacking $^1\text{H}$ NMR of Alk- Dox <b>14</b> -----                          | pg.16  |
| S27: Stacking $^1\text{H}$ NMR of AE- Dox conjugate <b>15</b> -----                 | pg.17  |
| S28: Stacking IR of AE-Dox conjugate <b>15</b> -----                                | pg.18  |
| S29: Cytotoxicity of $\text{N}_3$ -AE ( <b>9</b> ) and Alk- Dox ( <b>14</b> ) ----- | pg. 19 |

\*Author to whom correspondence should be addressed: (Prof. Robert Hanson) Email:

[r.hanson@neu.edu](mailto:r.hanson@neu.edu). Tel: 617-373-3313; Fax: 617-373-3879.

\*Bioorganic and Organic Chemistry Laboratory, Chemistry and Chemical Biology Department

‡Center for Pharmaceutical Biotechnology and Nanomedicine, Pharmaceutical Science Department

¥ Abbreviations: estrogen receptor (AE), tetraethylene glycol (TEG), tamoxifen (TAM), doxorubicin (DOX), estradiol (E<sub>2</sub>), antiestrogen-doxorubicin hybrid (AE-DOX), antiestrogen-tamoxifen hybrid (AE-TAM), azido-tamoxifen (N<sub>3</sub>-TAM), alkynated-doxorubicin (Ak-DOX), azido-antiestrogen (N<sub>3</sub>-AE).

Figure S1: <sup>1</sup>H NMR of 3,3-ethylenedioxy-5(10)-α-epoxy-estr-9(11)-ene

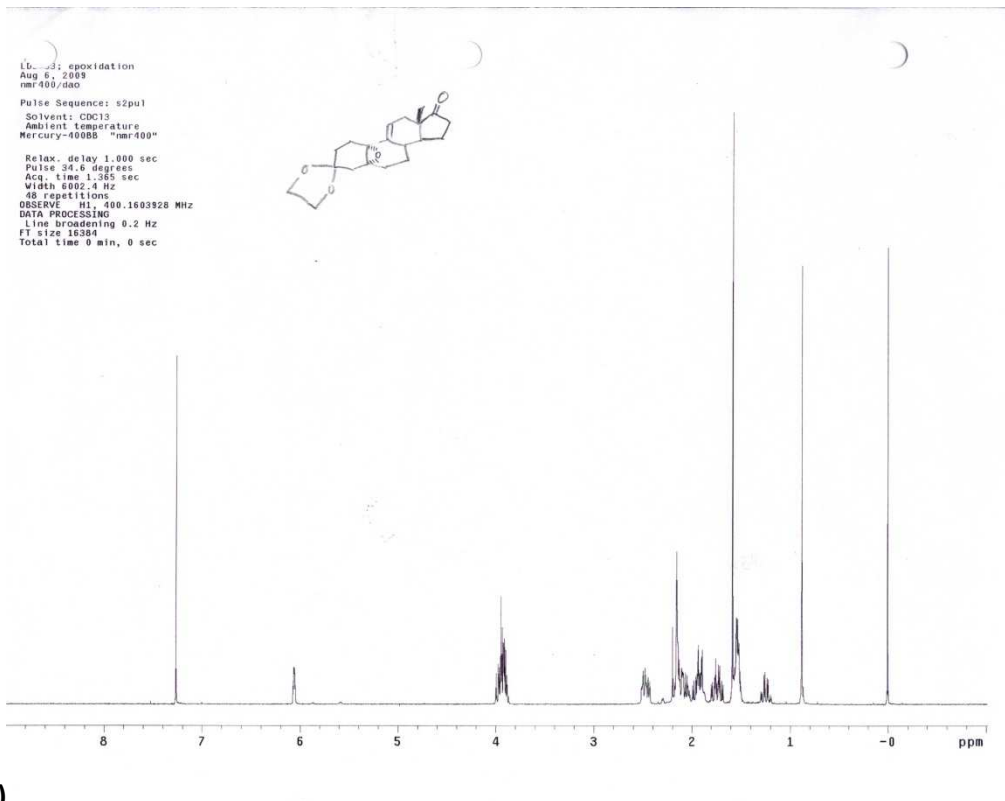

(2α)

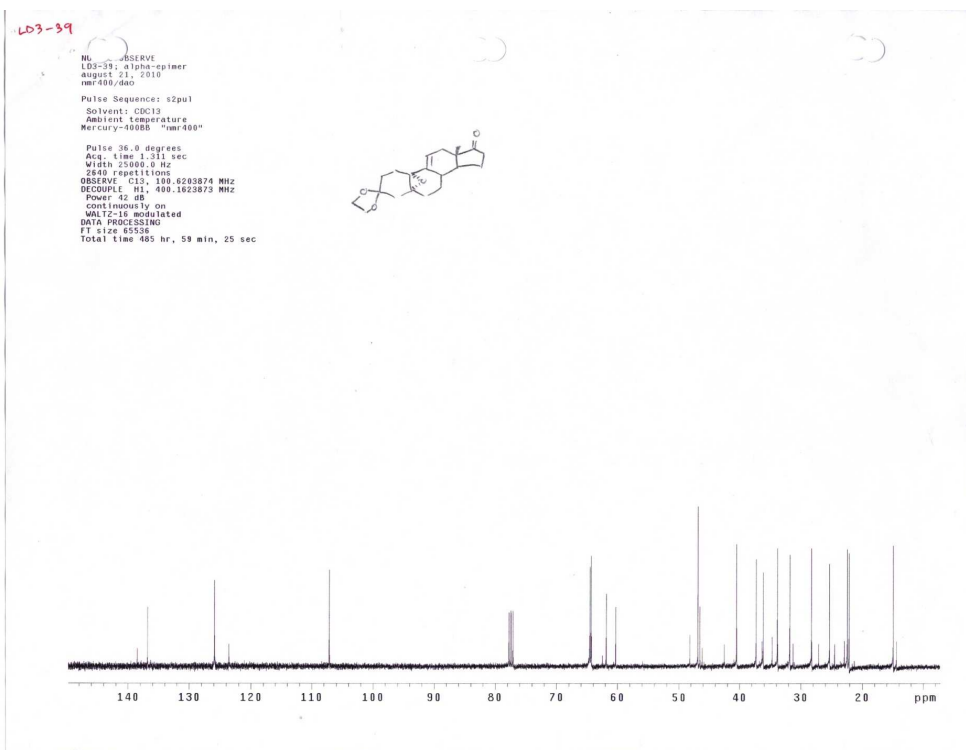

Figure S2: <sup>13</sup>C NMR of 3,3-ethylenedioxy-5(10)-α-epoxy-estr-9(11)-ene (2α)

Figure S3:  $^1\text{H}$  NMR of 11 $\beta$ -(4-Hydroxy-phenyl)-estra-4,9-diene-3,17-dione (3)

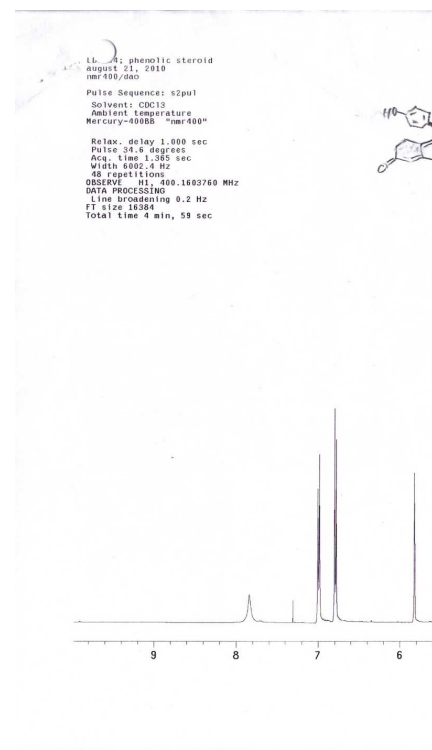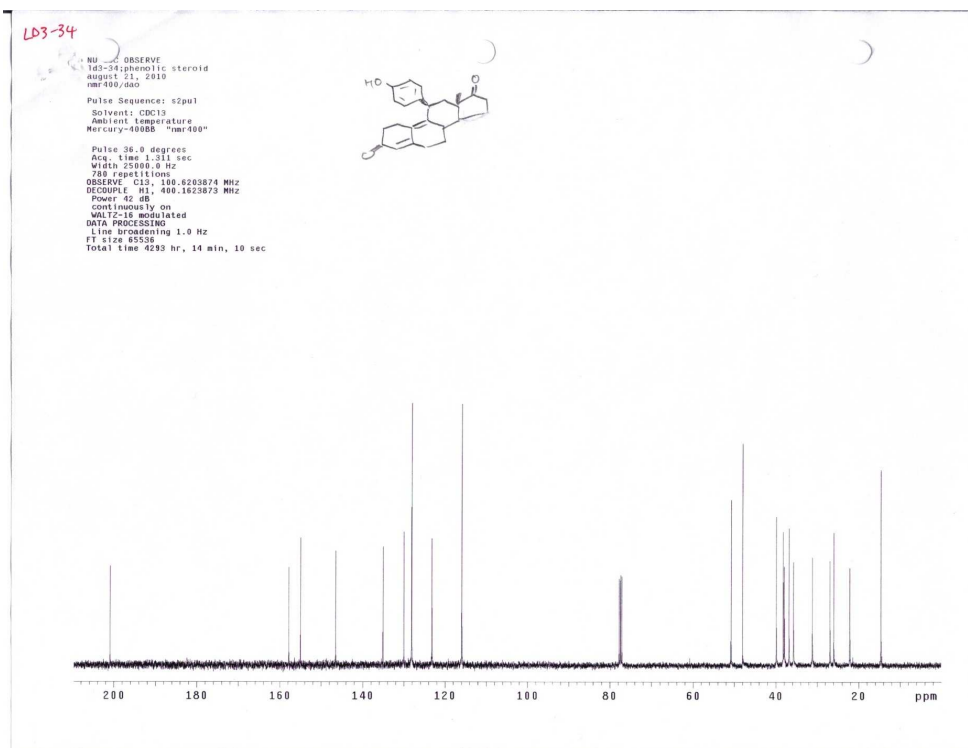

Figure S4:  $^{13}\text{C}$  NMR of 11 $\beta$ -(4-Hydroxy-phenyl)-estra-4,9-diene-3,17-dione (3)

Figure S5:  $^1\text{H}$  NMR of  $11\beta$ -[4-(2-Dimethylamino-ethoxy)-phenyl]-estra-4,9-diene-3,17-dione (4)

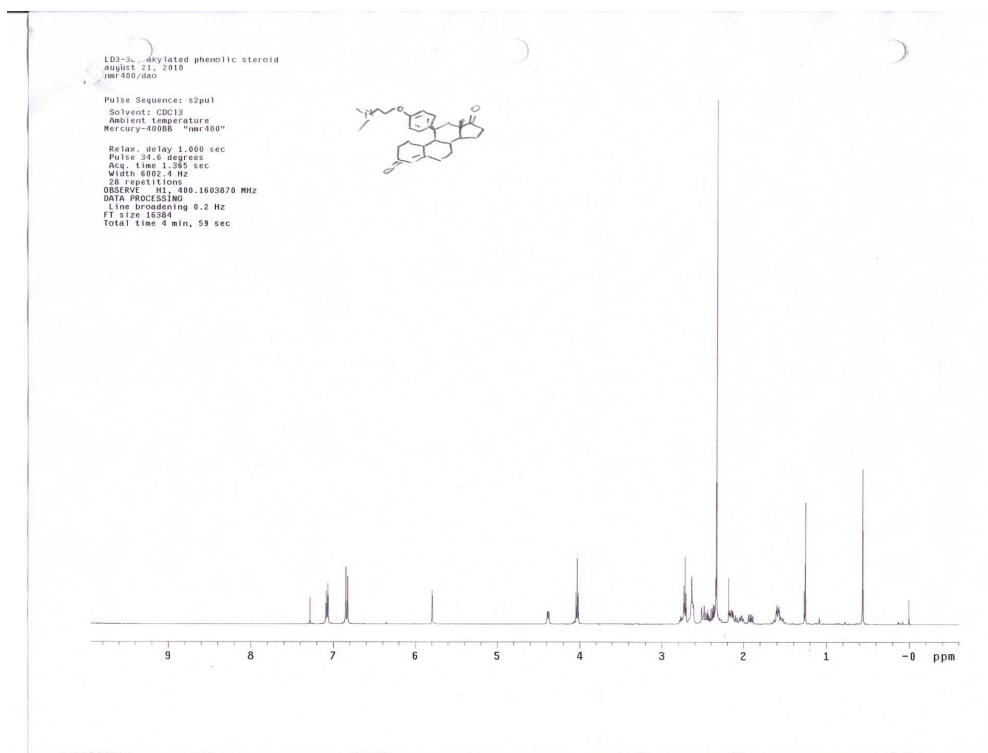

Figure S6:  $^{13}\text{C}$  NMR of 11 $\beta$ -[4-(2-Dimethylamino-ethoxy)-phenyl]-estra-4,9-diene-3,17-dione

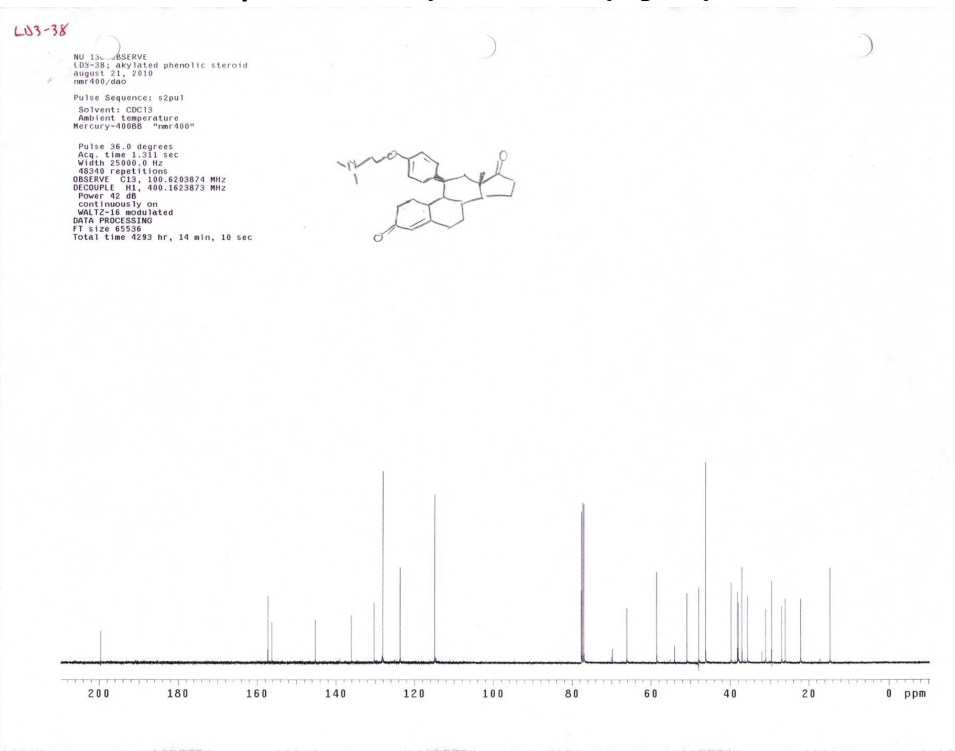

(4)

Figure S7:  $^1\text{H}$  NMR of 3-Acetoxy-11 $\beta$ -[4-(2-dimethylamino-ethoxy)-phenyl]-estra-1,3,5(10)-triene-17-one(5)

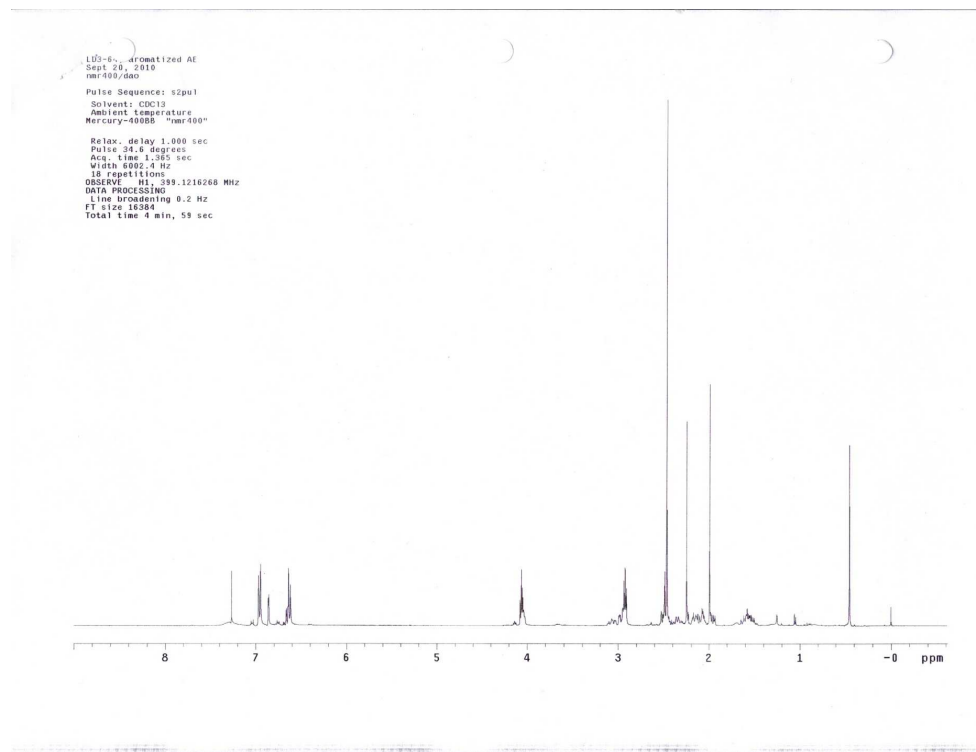

Figure S8:  $^{13}\text{C}$  NMR of 3-Acetoxy-11 $\beta$ -[4-(2-dimethylamino-ethoxy)-phenyl]-estra-1,3,5(10)-triene-17-

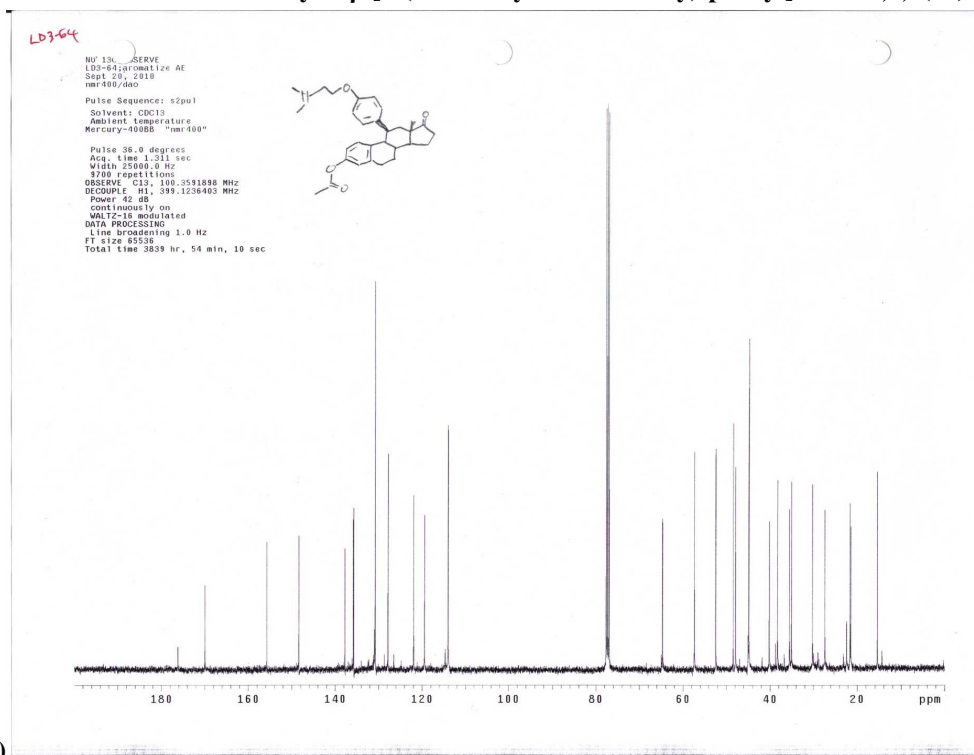

one(5)

Figure S9:  $^1\text{H}$  NMR of 11 $\beta$ -[4-(2-Dimethylamino-ethoxy)-phenyl]-estra-1,3,5(10)-triene-3,17 $\beta$ -diol (6)

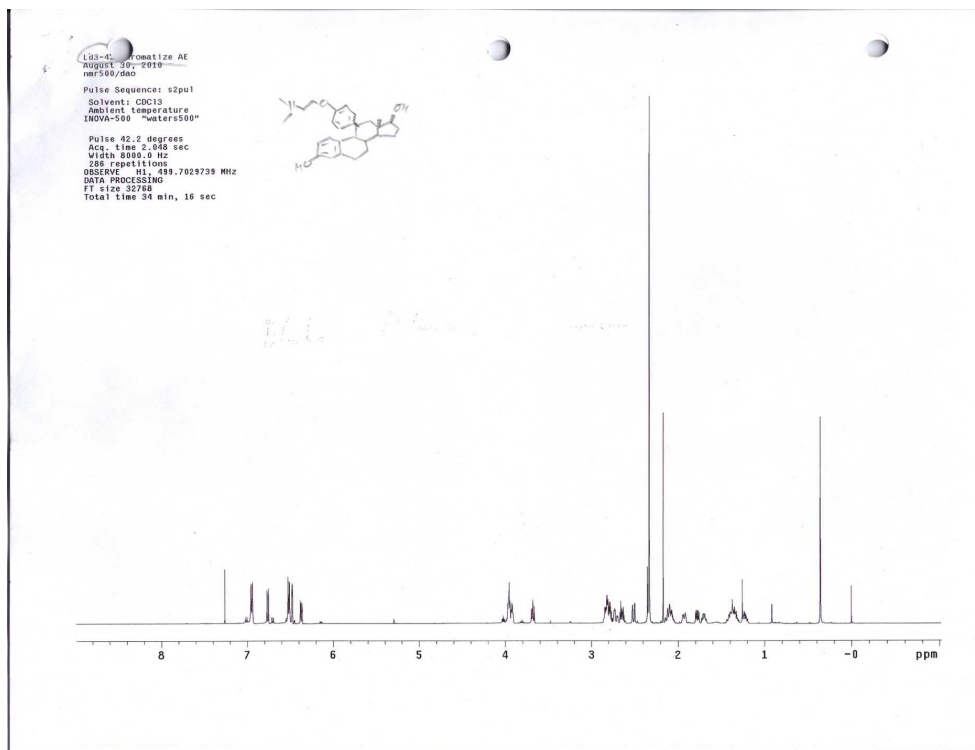

Figure S10:  $^{13}\text{C}$  NMR of 11 $\beta$ -[4-(2-Dimethylamino-ethoxy)-phenyl]-estra-1,3,5(10)-triene-3,17 $\beta$ -diol

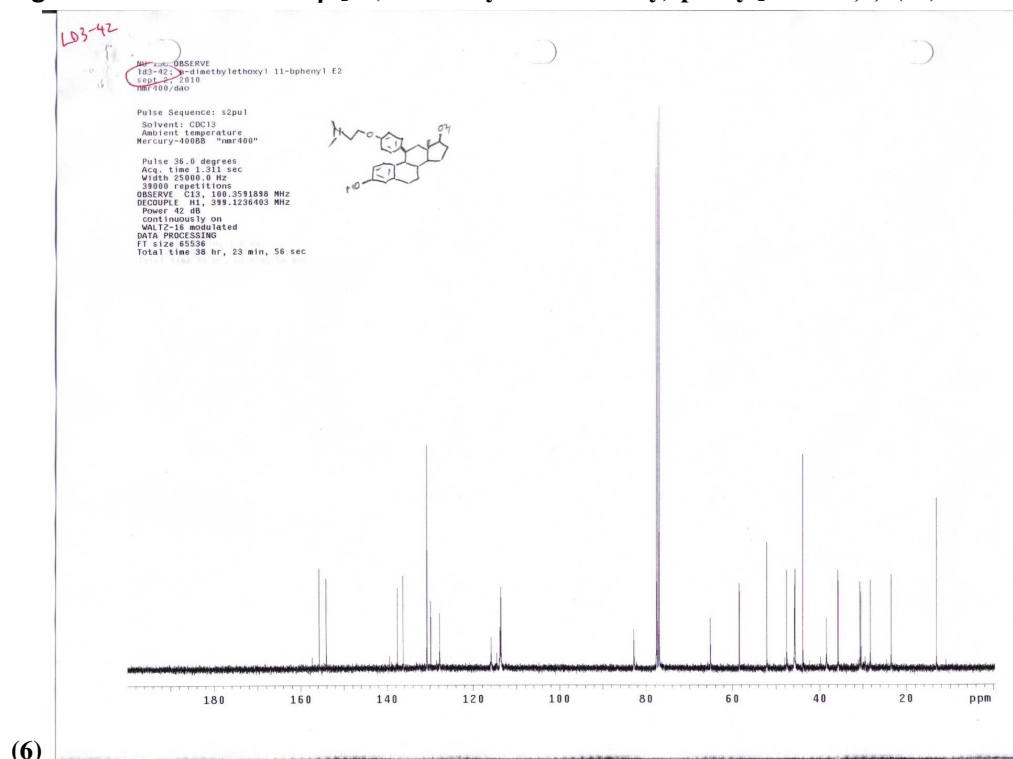

Figure S11:  $^1\text{H}$  NMR of 11 $\beta$ -[4-(2-methylamino-ethoxy)-phenyl]-estra-1,3,5(10)-triene-3,17 $\beta$ -diol (7)

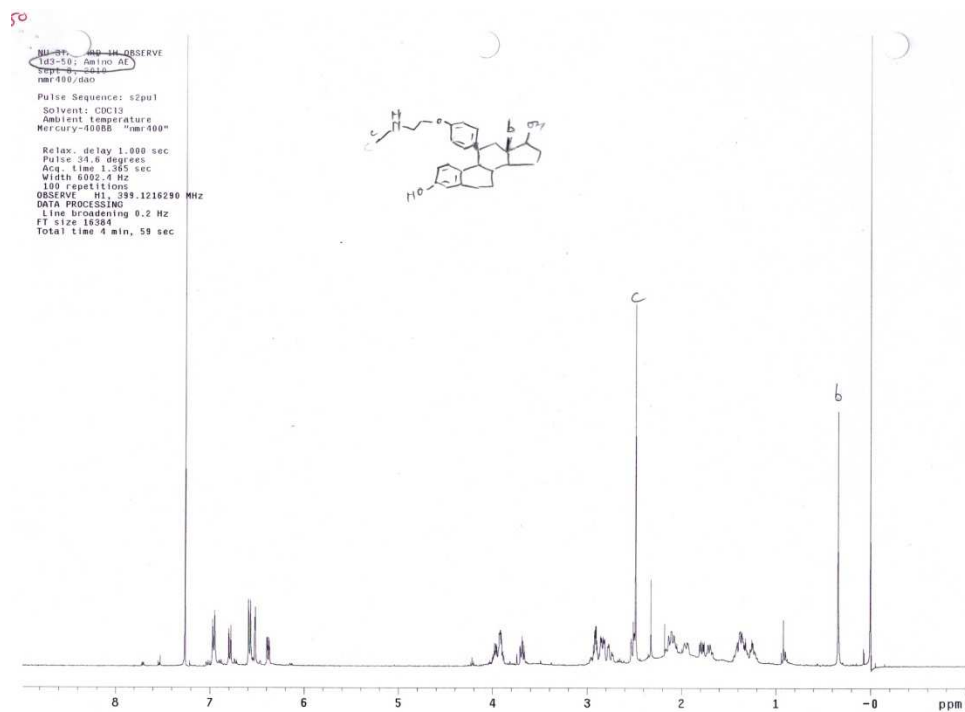

Figure S12:  $^{13}\text{C}$  NMR of 11 $\beta$ -[4-(2-methylamino-ethoxy)-phenyl]-estra-1,3,5(10)-triene-3,17 $\beta$ -diol (7)



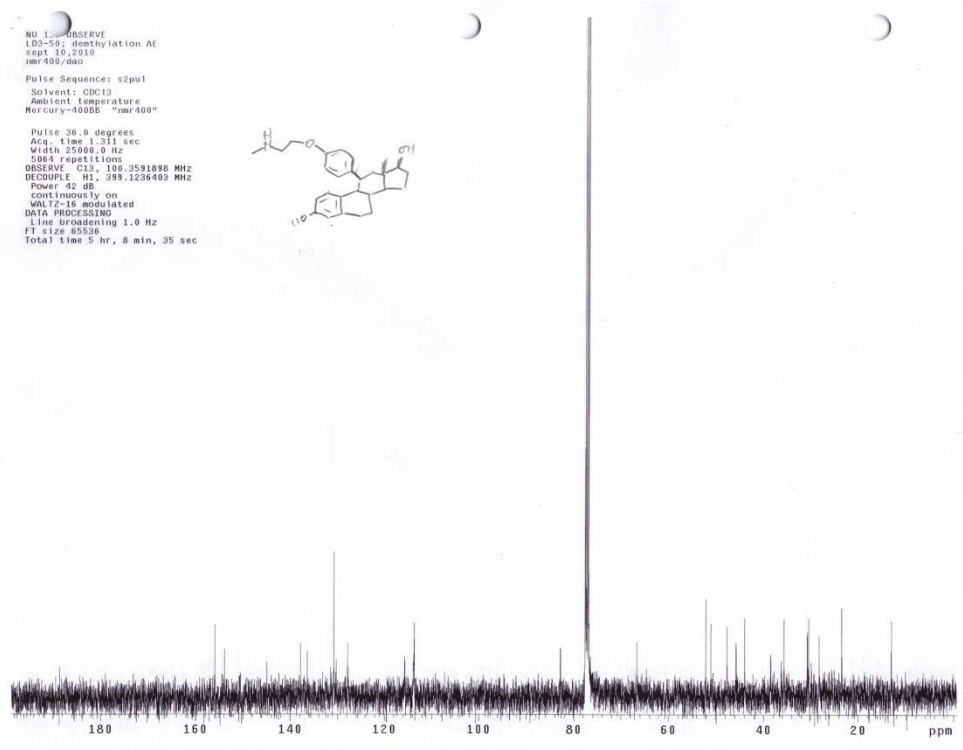

Figure S13:  $^1\text{H}$  NMR of 2-[2-[2-(2-Azido-ethoxy)-ethoxy]-ethoxy]-ethyl tosylate (8)

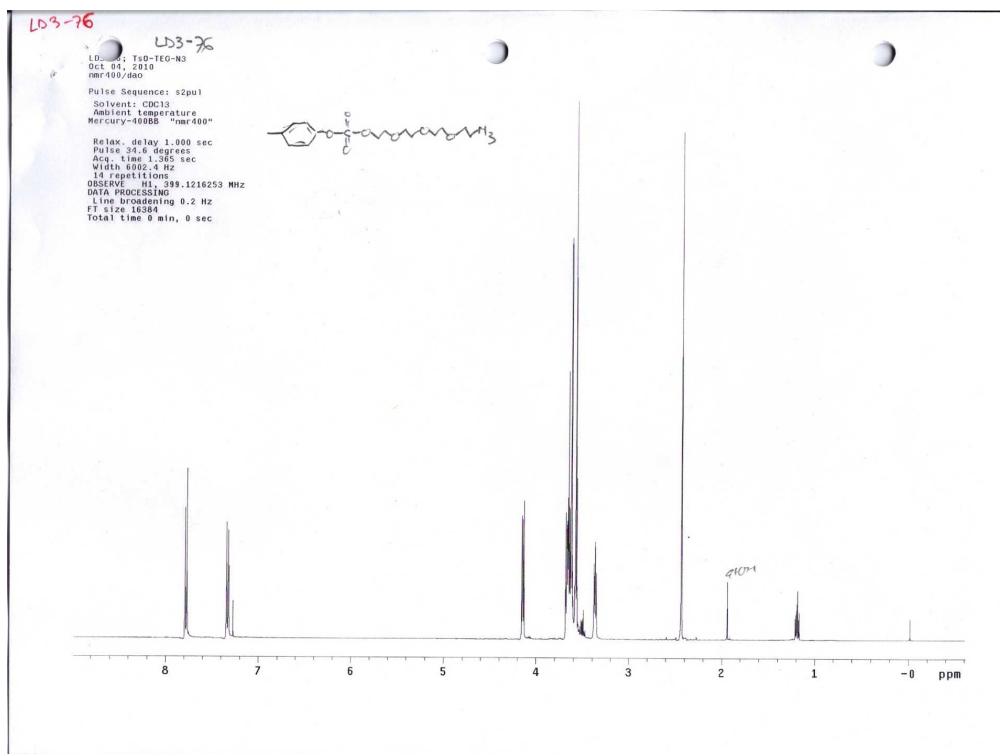

Figure S14:  $^{13}\text{C}$  NMR of 2-{2-[2-(2-Azido-ethoxy)-ethoxy]-ethoxy}-ethyl tosylate (8)

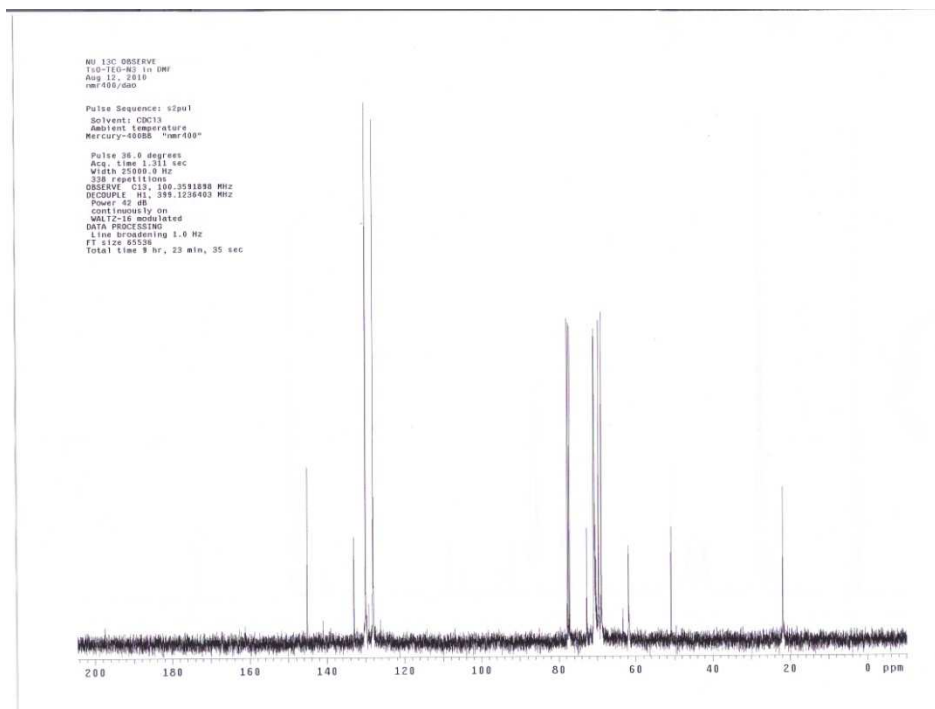

Figure S15:  $^1\text{H}$  NMR of 11 $\beta$ -(4-{2-[2-(2-[2-(2-Azido-ethoxy)-ethoxy]-ethoxy)-ethyl)-methyl-amino]-ethoxy}-phenyl)-estra-1,3,5(10)-triene-3,17 $\beta$ -diol (9)

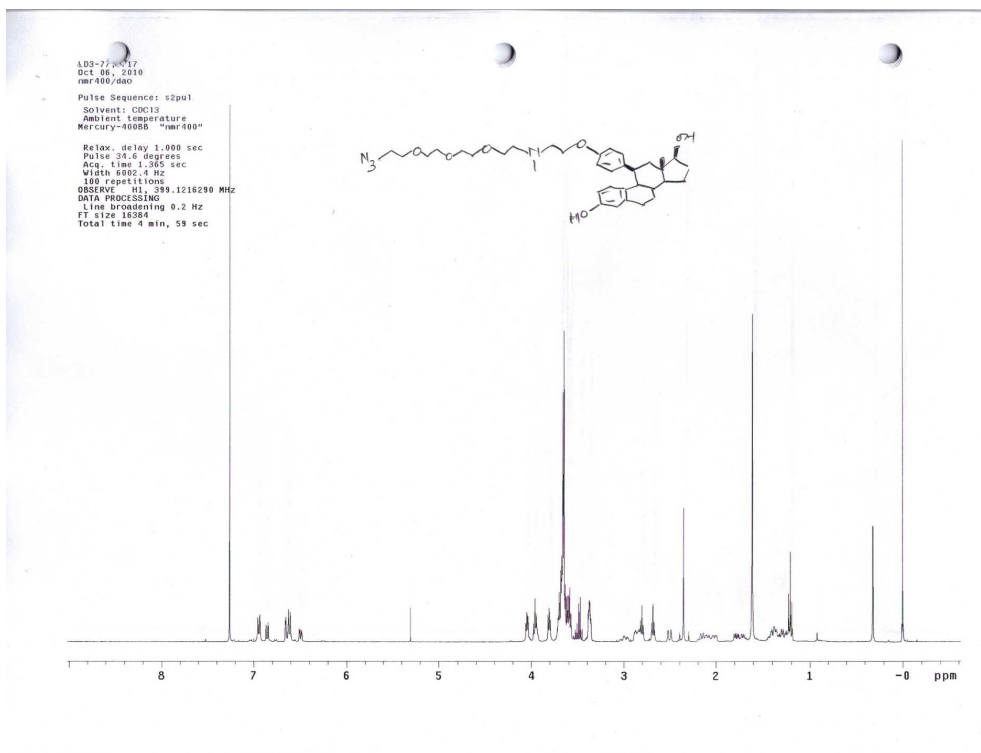

**Figure S16:**  $^{13}\text{C}$  NMR of  $11\beta$ -(4-{2-[(2-{2-[2-(2-Azido-ethoxy)-ethoxy]-ethoxy}-ethyl)-methyl-amino]-ethoxy}-phenyl)-estra-1,3,5(10)-triene-3,17 $\beta$ -diol (9)

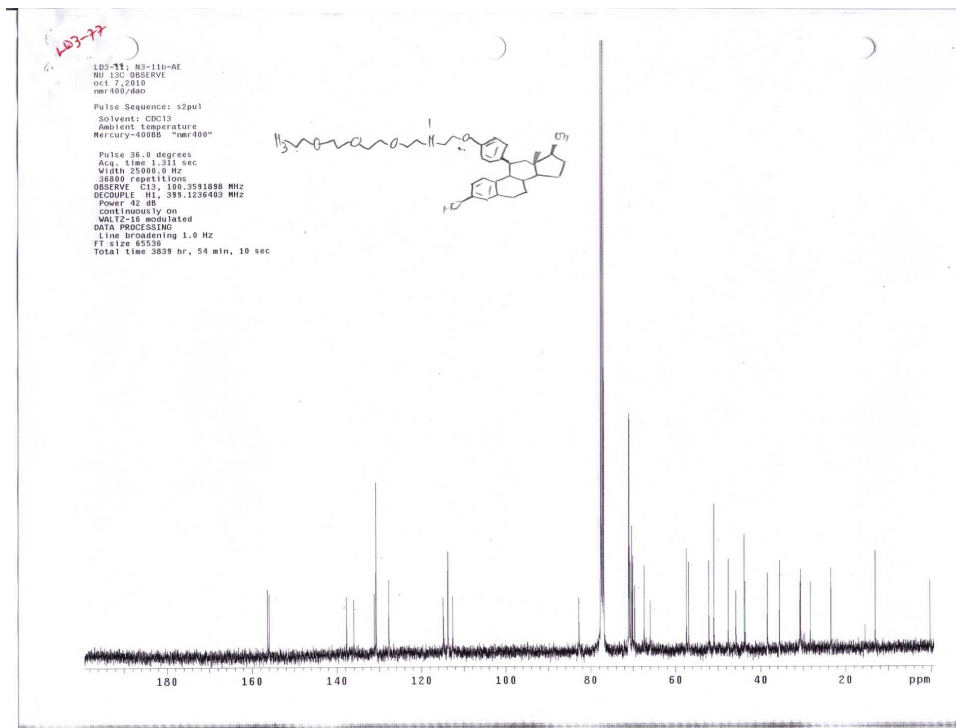

**Figure S17:**  $^1\text{H}$  NMR of 2-{2-[2-(2-Prop-2-ynyloxy-ethoxy)-ethoxy]-ethoxy}-ethanol (10)

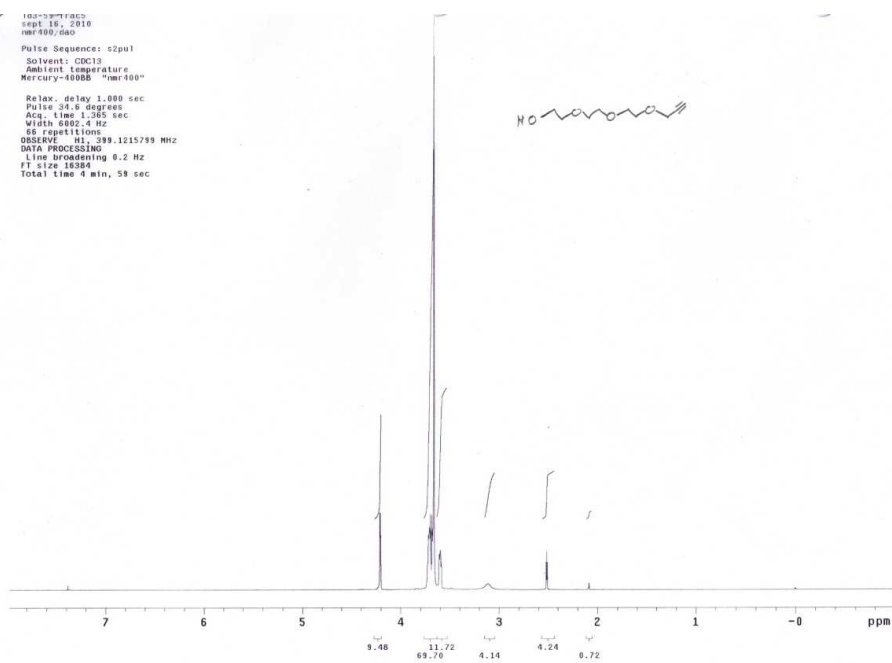

Figure S18:  $^{13}\text{C}$  NMR of 2-{2-[2-(2-Prop-2-ynyloxy-ethoxy)-ethoxy]-ethoxy}-ethanol (10)

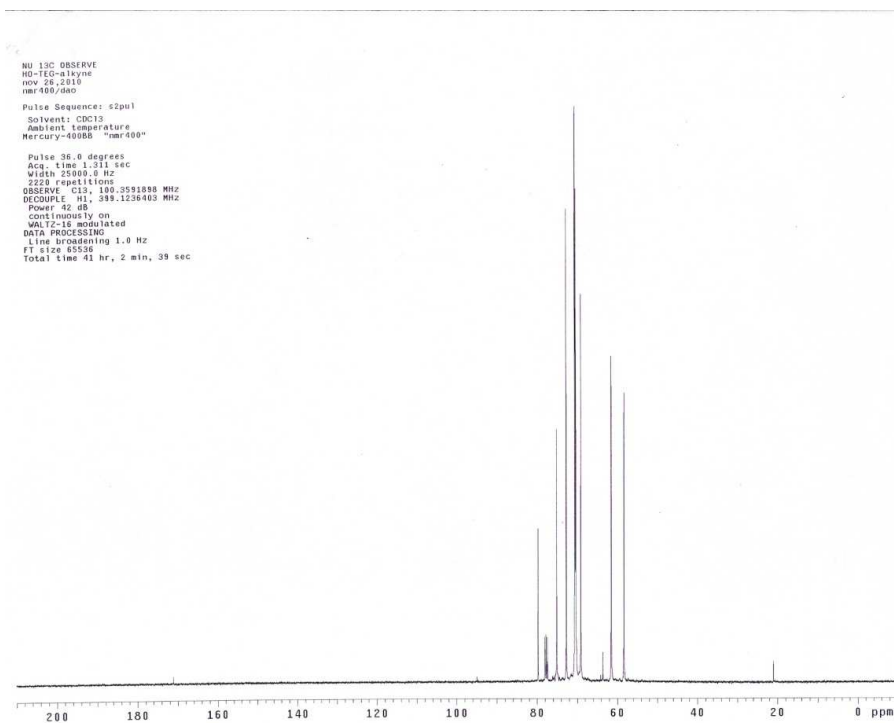

Figure S19:  $^1\text{H}$  NMR of 2-(2-(2-(2-(Prop-2-ynyloxy)-ethoxy)-ethoxy)-ethoxy)-ethanol tosylate (11)

ynyloxy)-ethoxy)-ethoxy)-ethoxy)-ethanol tosylate (11)

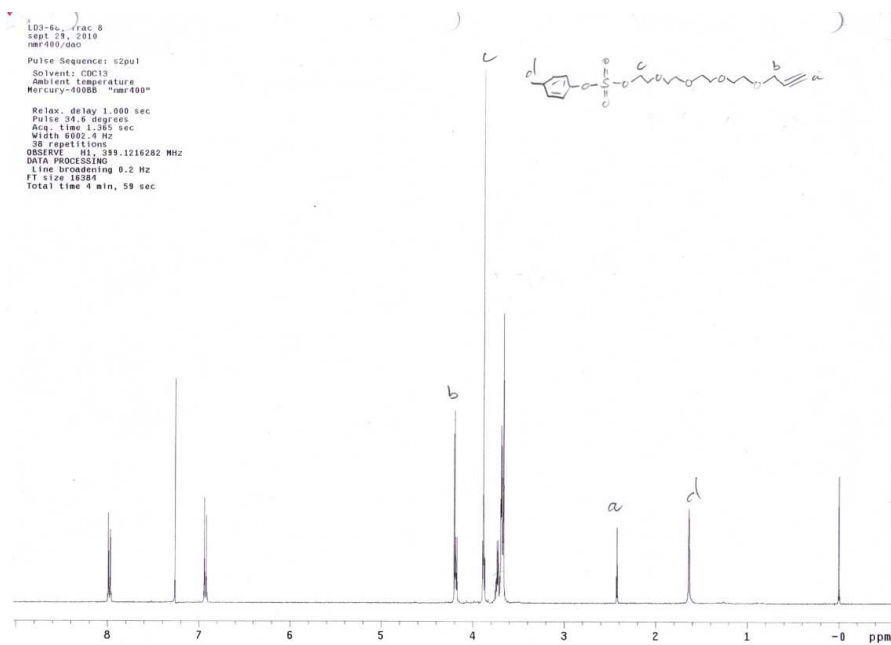

Figure S20:  $^{13}\text{C}$  NMR of 2-(2-(2-(2-(Prop-2-ynnyloxy)-ethoxy)-ethoxy)-ethoxy)-ethanol tosylate (11)

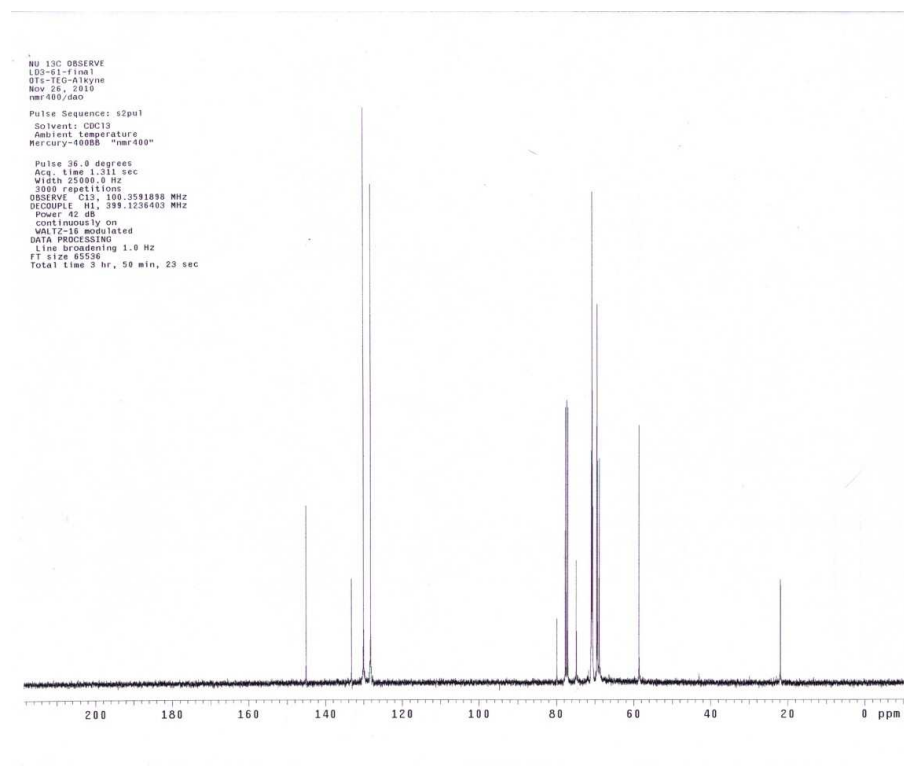

Figure S21:  $^1\text{H}$  NMR of Methyl 4-(2-(2-(2-(2-(prop-2-ynnyloxy) ethoxy)ethoxy)ethoxy)ethoxy)benzoate

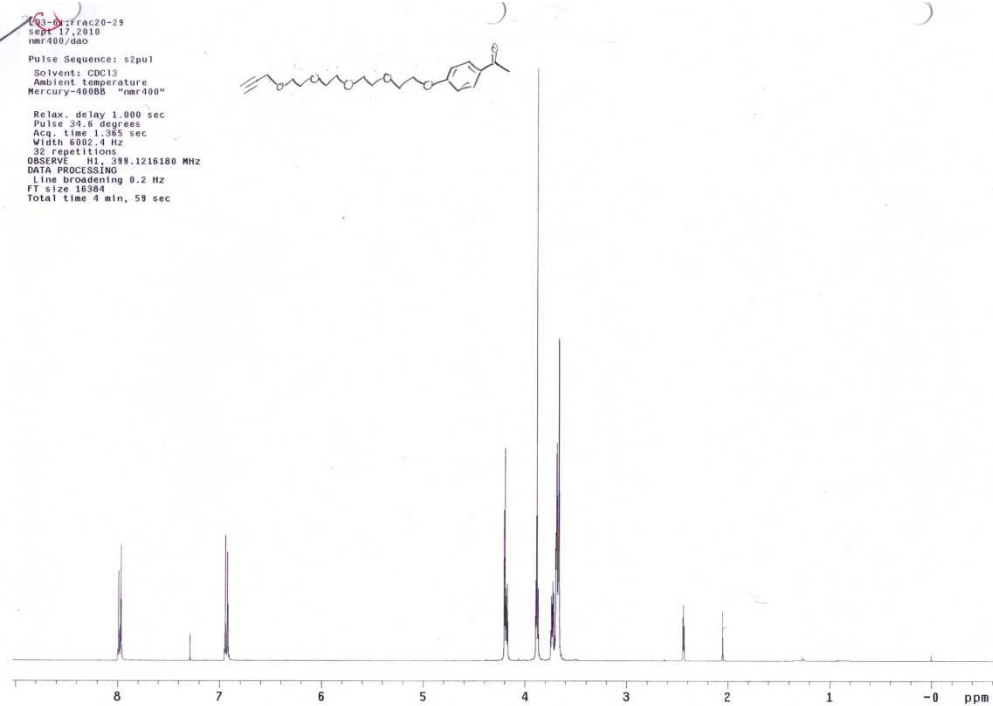

(12)

Figure S22:  $^{13}\text{C}$  NMR of Methyl 4-(2-(2-(2-(2-(prop-2-ynyloxy) ethoxy)ethoxy)ethoxy)ethoxy)benzoate (12)

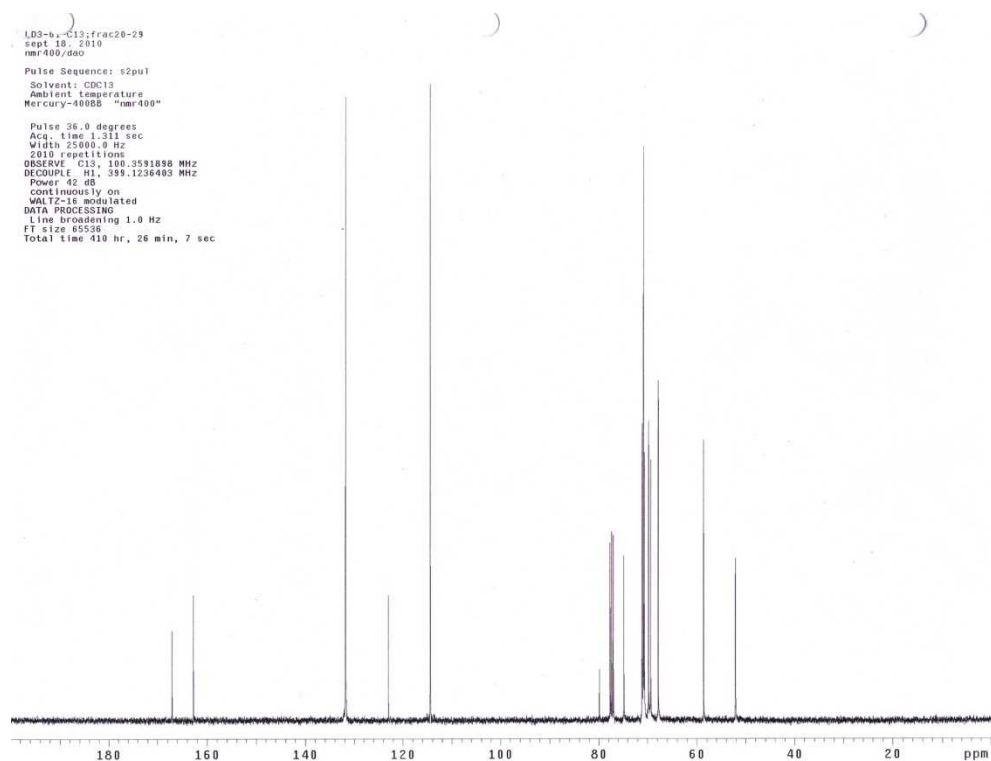

Figure S23:  $^1\text{H}$  NMR of 4-(2-[2-[2-(2-Prop-2-ynyloxy-ethoxy)-ethoxy]-ethoxy]-ethoxy)-benzoic acid hydrazide (13)

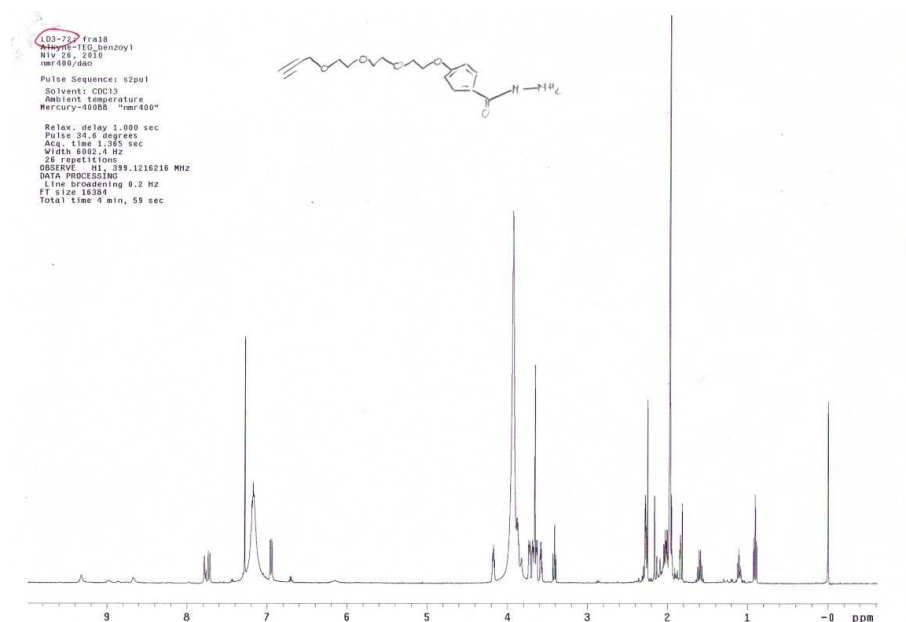

**Figure S24:**  $^{13}\text{C}$  NMR of 134-(2-{2-[2-(2-Prop-2-ynyloxy-ethoxy)-ethoxy]-ethoxy}-ethoxy)-benzoic acid hydrazide (13)

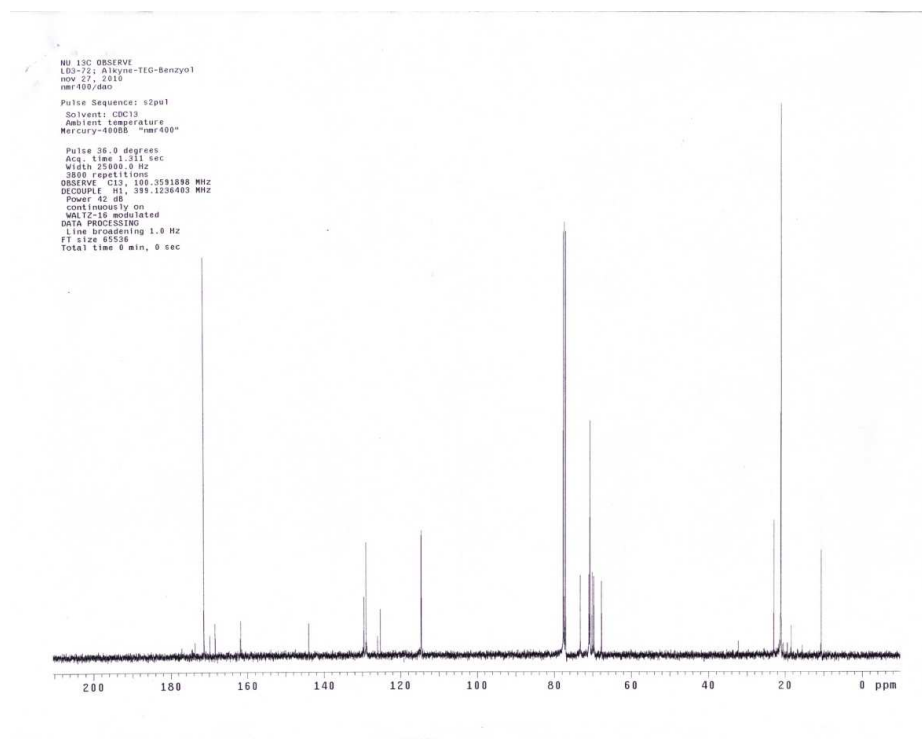

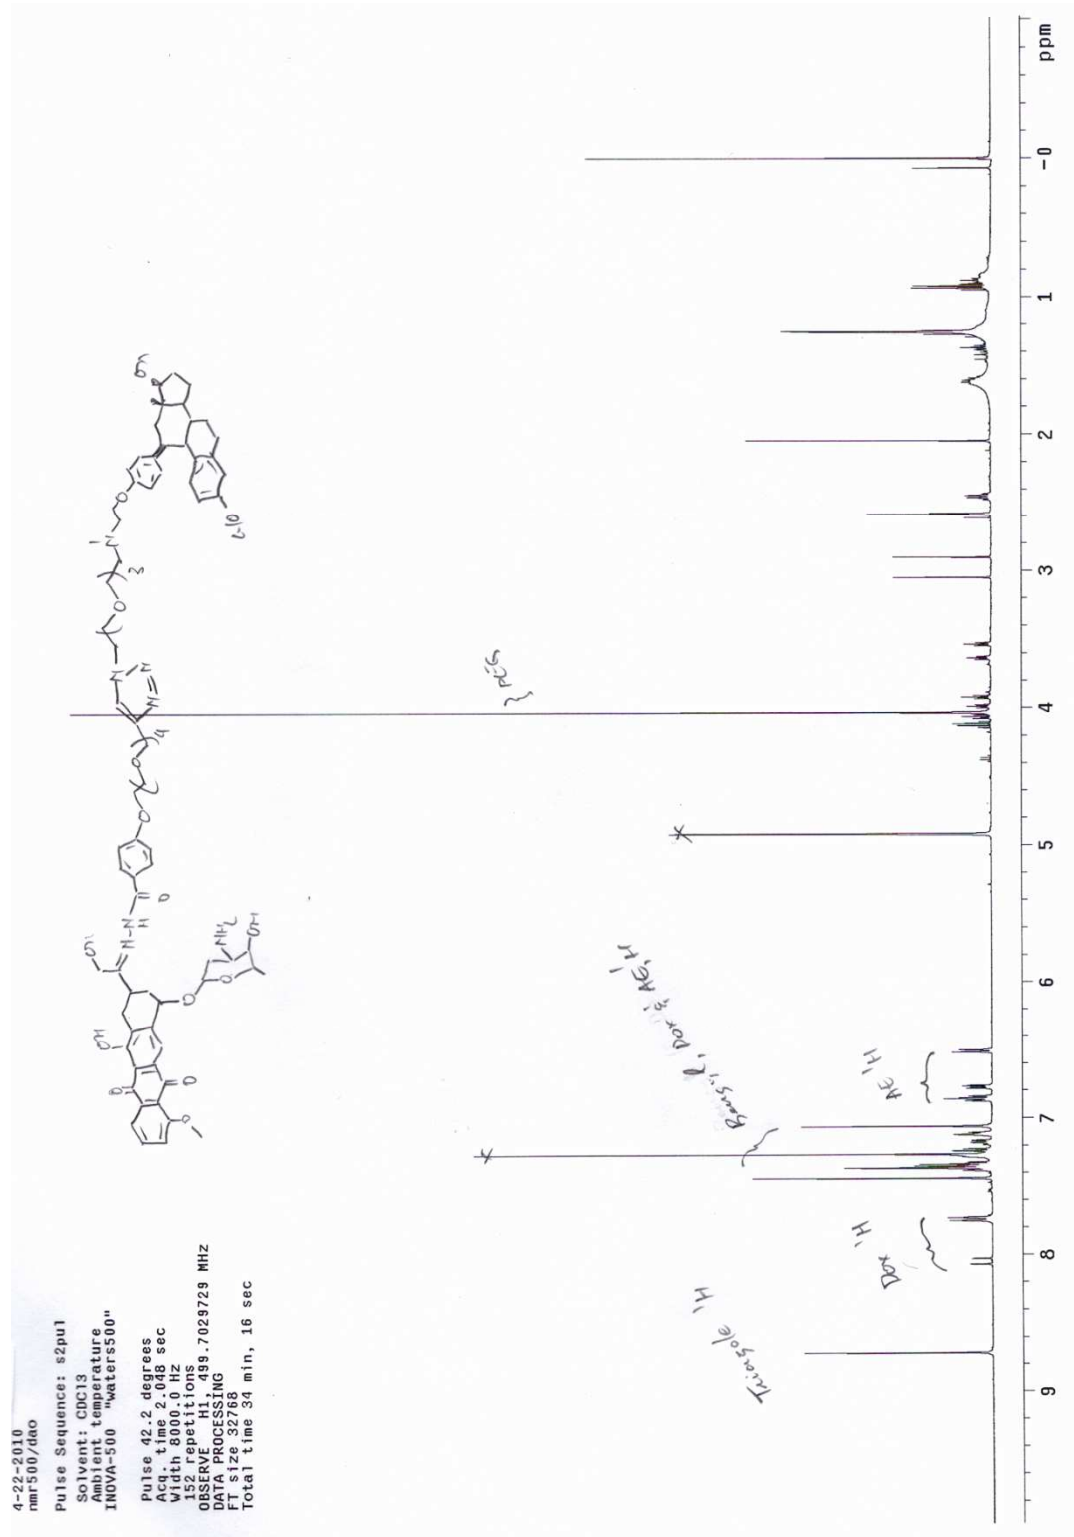

Figure S25: <sup>1</sup>H NMR of AE-Dox conjugate (15)



Figure S26: Stack 1H NMR of Alkynate Dox derivative 14

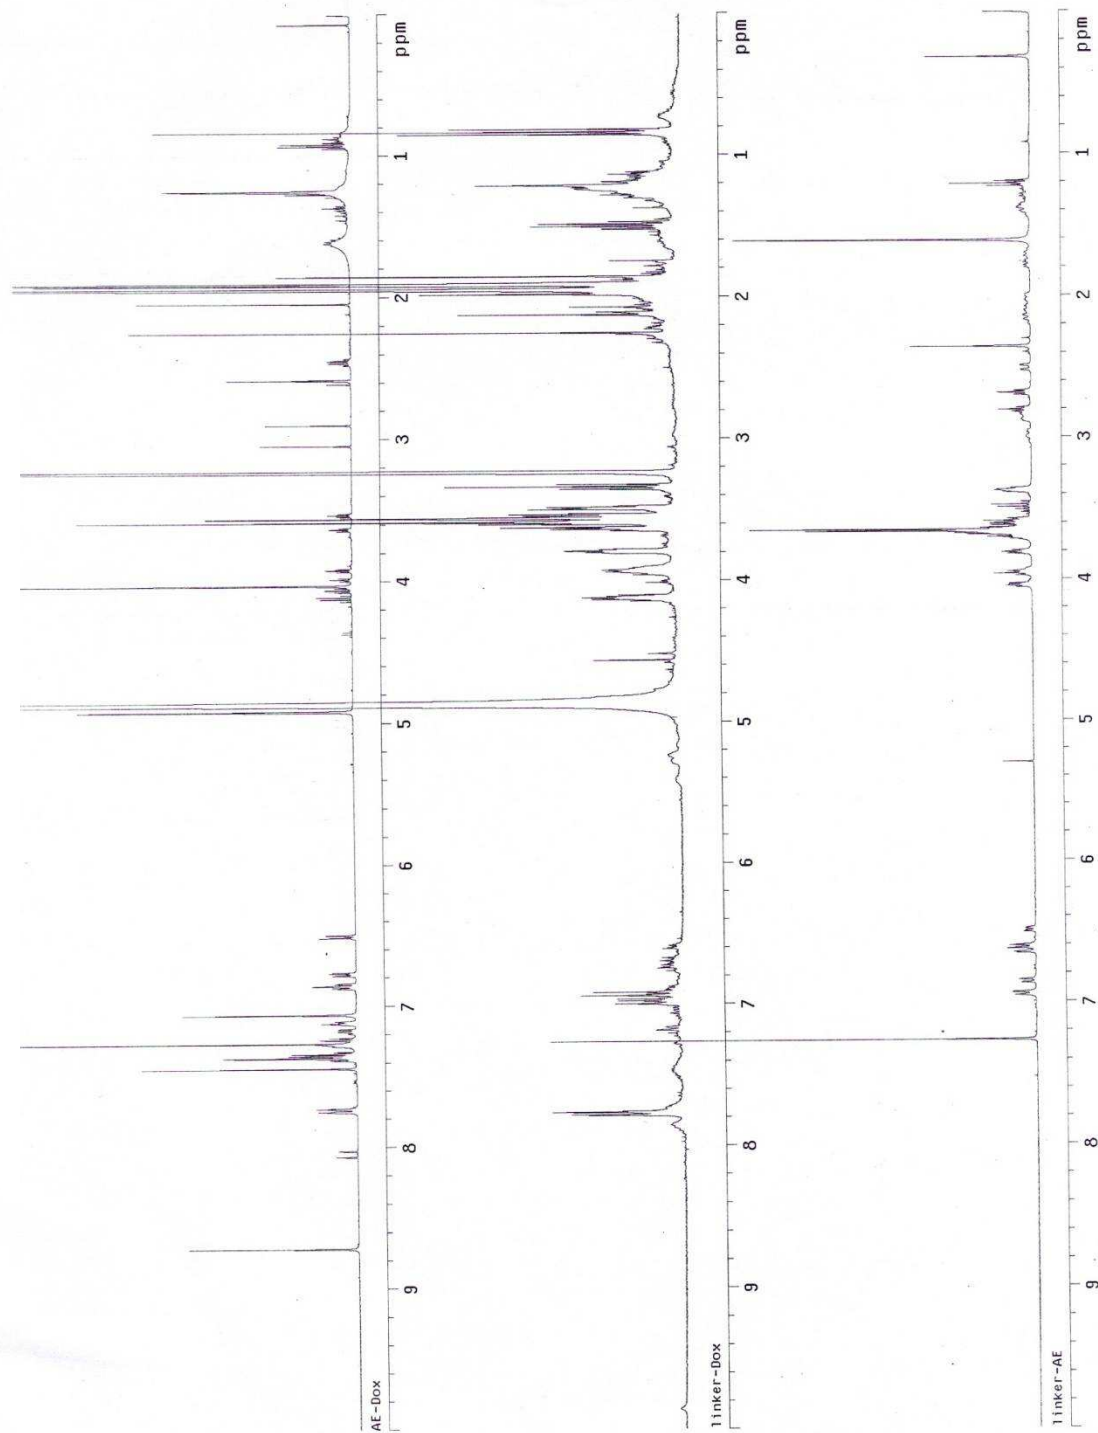

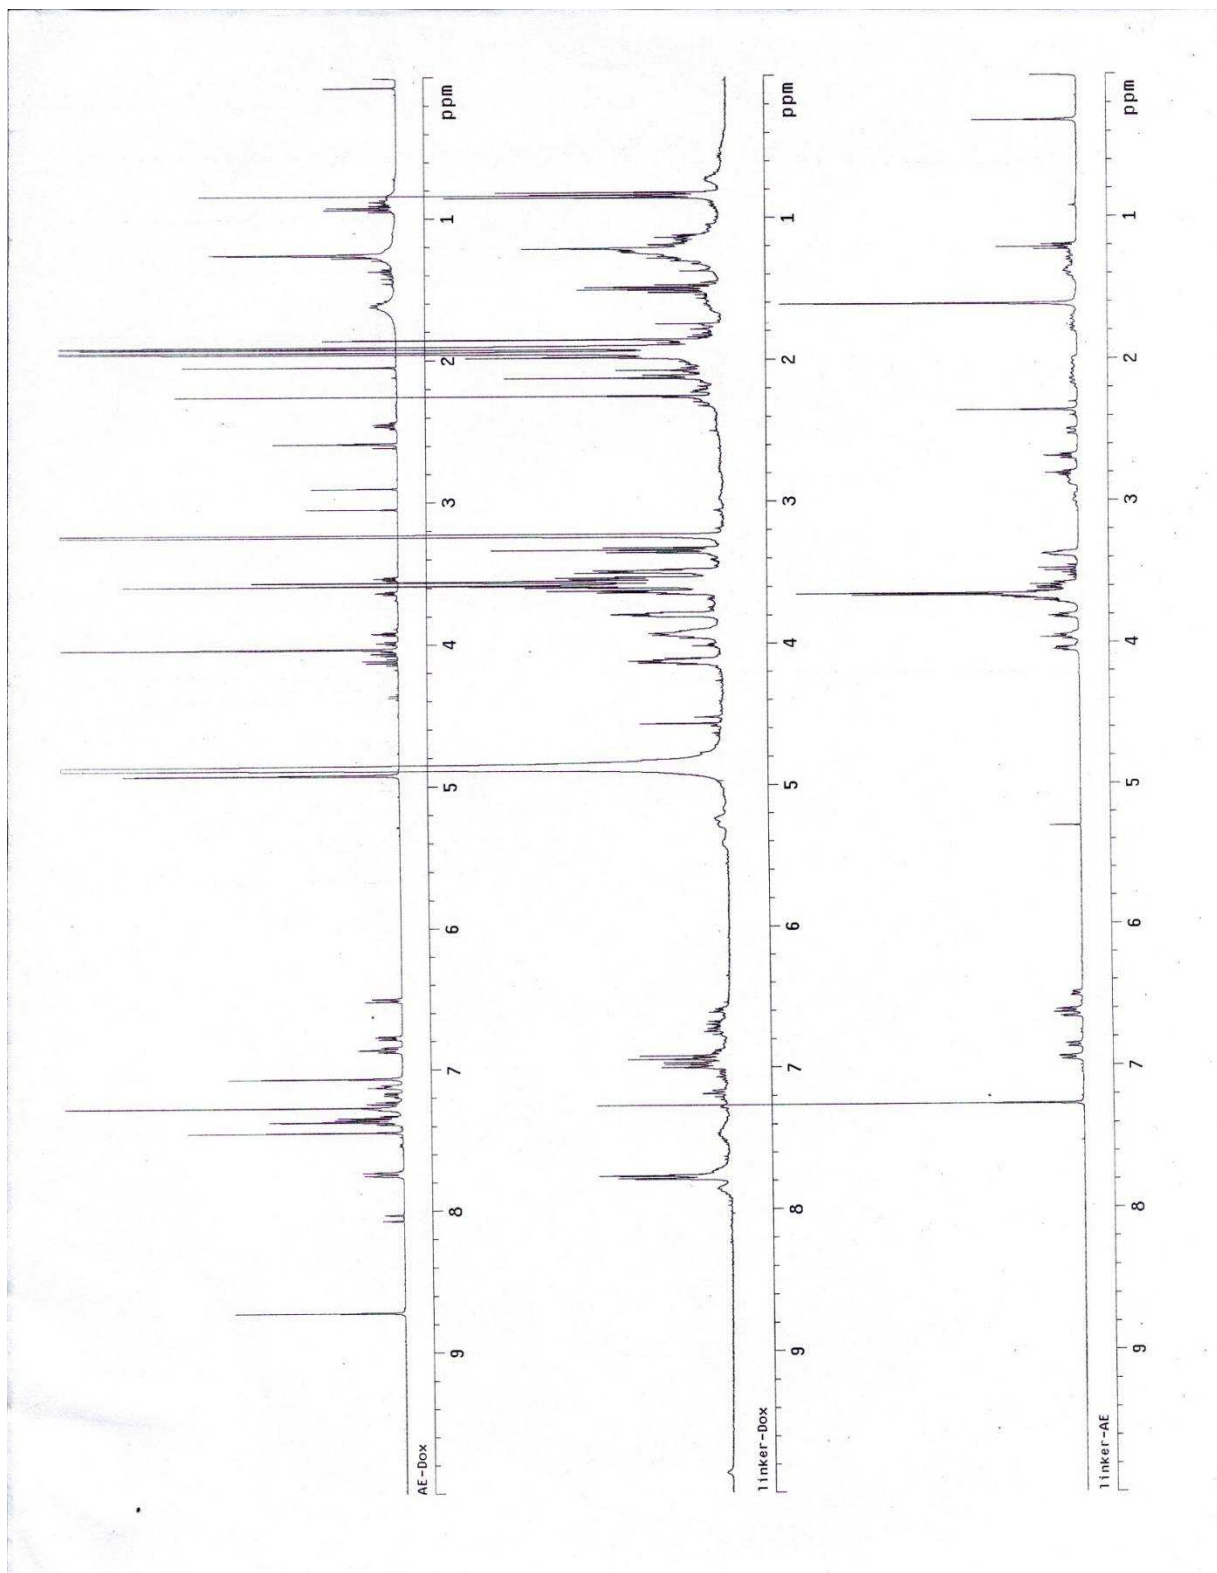

Figure S27: Stack 1H NMR of AE- Dox conjugate (15)

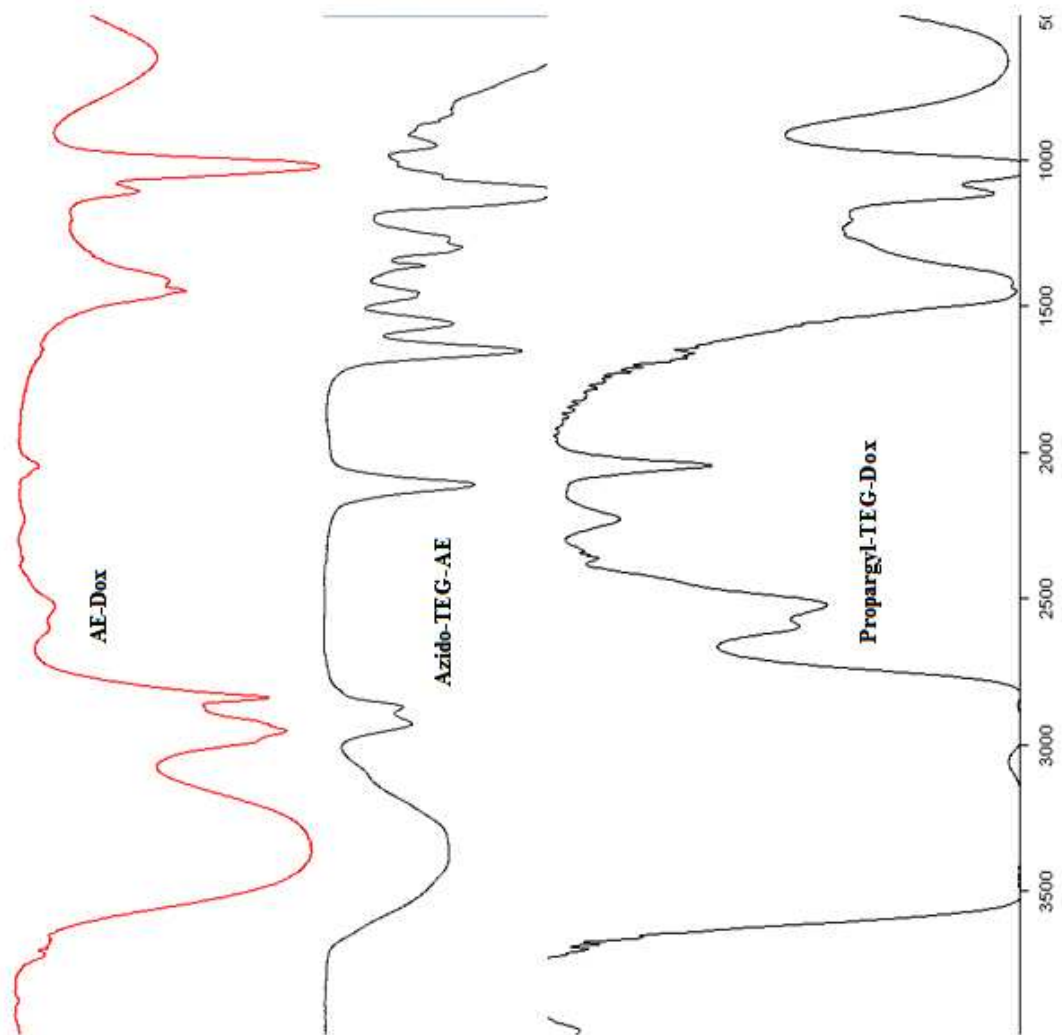

**Figure S28:** Stack IR of AE- Dox conjugate (15)

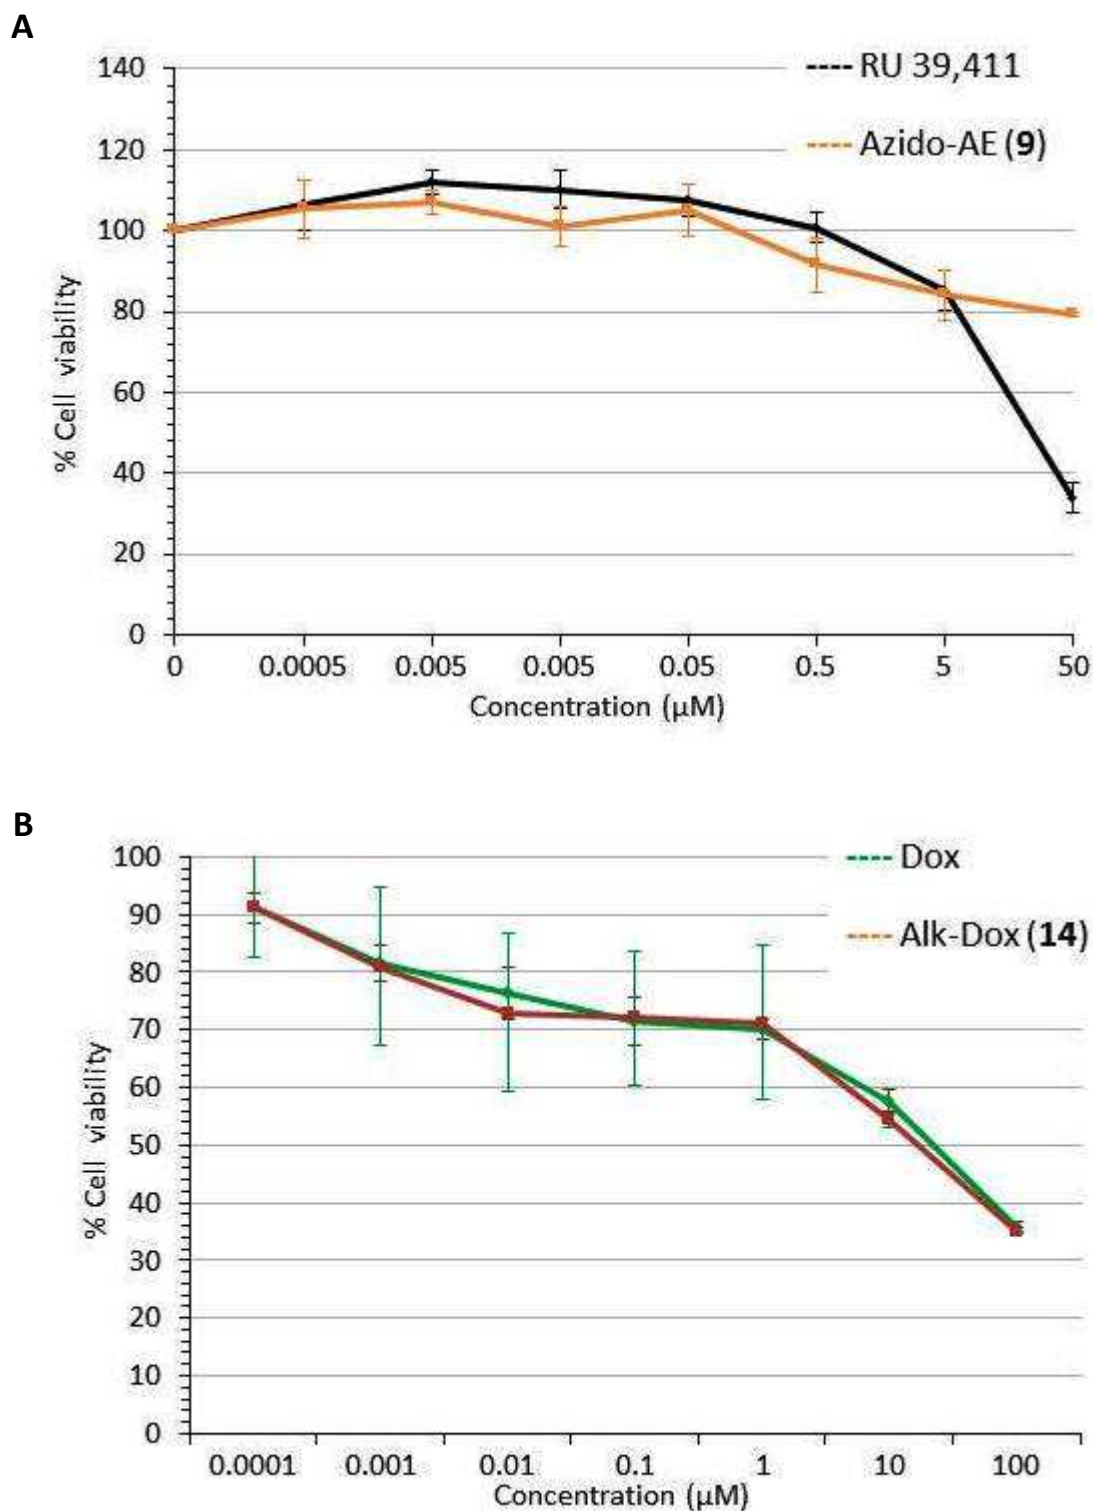

**Figure S29:** Comparing cytotoxicity of modified A) Azido-AE (9), and B) Alk-Dox (14) with their parent compounds treated in MCF-7 (24h)
